# Supplementary material for: Improving Uptake of Postnatal Checking of Blood Glucose in Women Who Had Gestational Diabetes Mellitus in Universal Healthcare Settings: A Systematic Review
Source: MDPI journal article supplement (doi:10.3390/jcm8010004), 2018-12-20
Supplement: s1 [file s1]

**Example database search strategy; the search strategy below was used for the Ovid Medline search and then adapted as appropriate to the other databases.**

|                                                                                                                                                                      | <b>Search term</b>                                                                                                                                                                                         |
|----------------------------------------------------------------------------------------------------------------------------------------------------------------------|------------------------------------------------------------------------------------------------------------------------------------------------------------------------------------------------------------|
| 1                                                                                                                                                                    | exp Diabetes, Gestational/                                                                                                                                                                                 |
| 2                                                                                                                                                                    | gestational diabetes.tw.                                                                                                                                                                                   |
| 3                                                                                                                                                                    | 1 or 2                                                                                                                                                                                                     |
| 4                                                                                                                                                                    | exp Postpartum Period/                                                                                                                                                                                     |
| 5                                                                                                                                                                    | (postpartum or postnatal or post-partum or post-natal or post-delivery or postdelivery or post-birth or postbirth).tw.                                                                                     |
| 6                                                                                                                                                                    | 4 or 5                                                                                                                                                                                                     |
| 7                                                                                                                                                                    | 3 and 6                                                                                                                                                                                                    |
| 8                                                                                                                                                                    | (uptake or non-uptake or detect* or management or follow-up or recurren* or assess* or identif* or screen* or test* or barrier* or recall or attend* or adhere* or complian* or comply or participat*).tw. |
| 9                                                                                                                                                                    | exp Patient Compliance/                                                                                                                                                                                    |
| 10                                                                                                                                                                   | 8 or 9                                                                                                                                                                                                     |
| 11                                                                                                                                                                   | 7 and 10                                                                                                                                                                                                   |
| All databases were searched from their inception (1946 for Medline, 1974 for Embase, 1979 for CINAHL, 1993 for Cochrane Library) to the 19 <sup>th</sup> March 2018. |                                                                                                                                                                                                            |
